# Supplementary material
Source: Springer Nature journal article supplement (https://www.springermedizin.de/resource/supplementary/13069_2008_5_MOESM9_ESM.pdf/9659588)
Supplement: MOESM9 [file 9659588]

**a) Cells under physiological conditions**

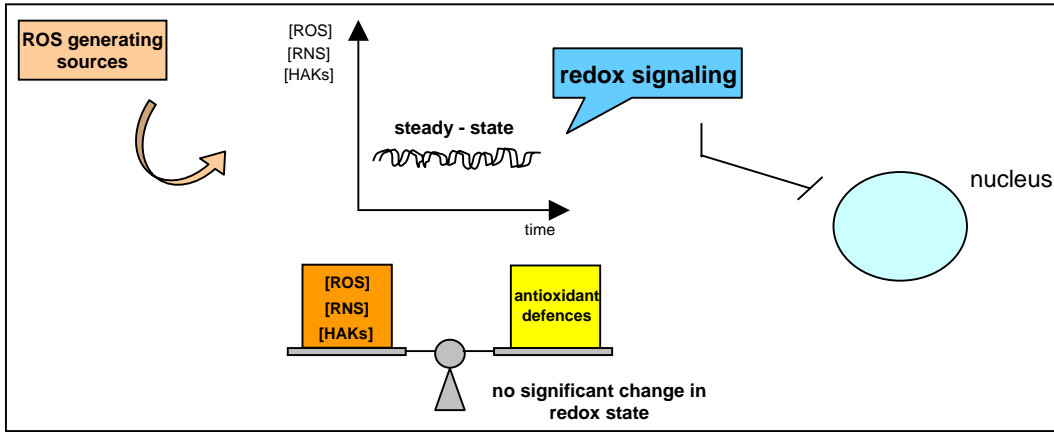

absence of redox-dependent responses

**b) Cells in which a significant level of intracellular ROS generation occur**

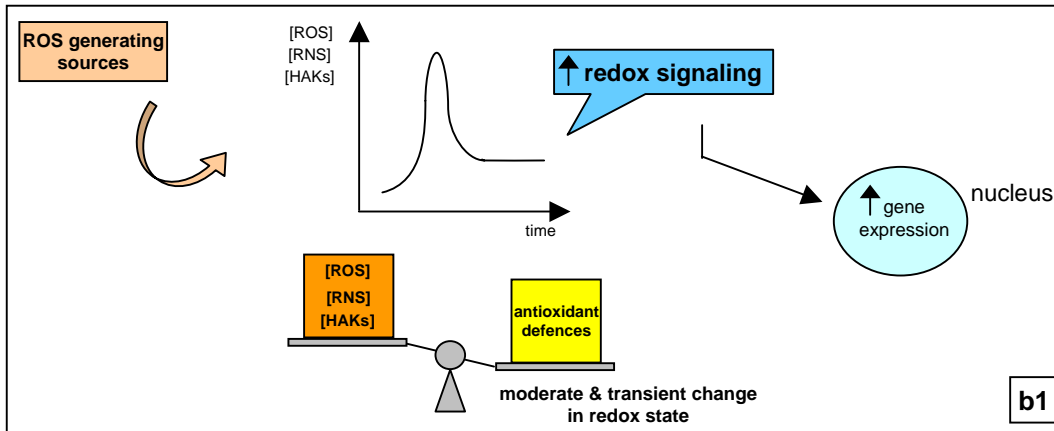

oxidative stress or anti-oxidative response

antioxidant defences

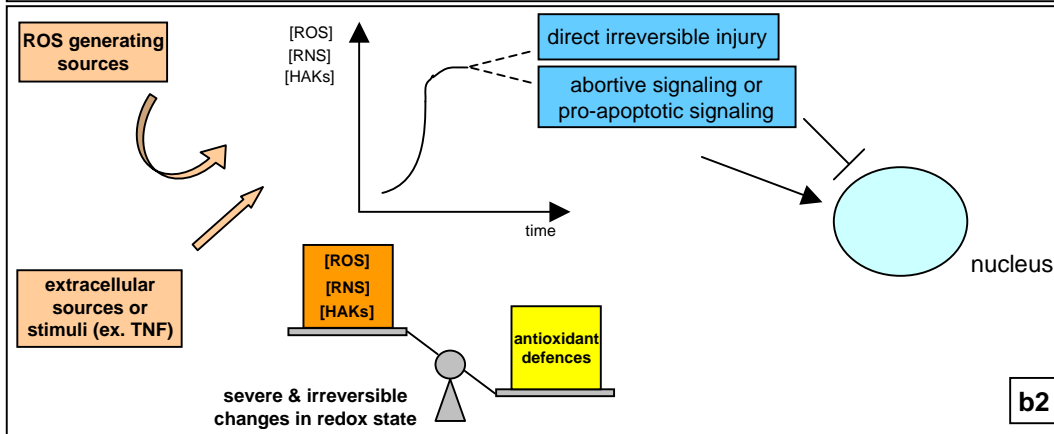

induction of cell death

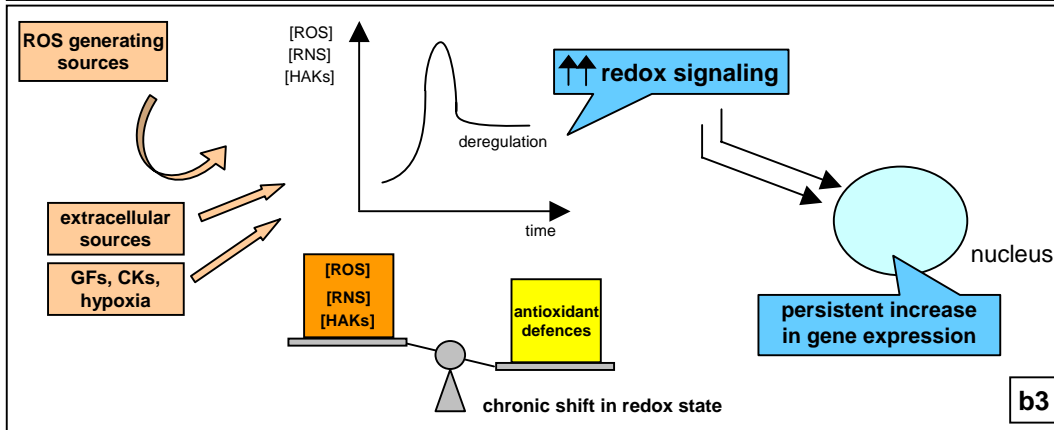

up-regulation of different patterns of gene expression

pathological conditions
